# Supplementary material for: Controllable ionic liquid-assisted electrochemical exfoliation of carbon fibers for the green and large-scale preparation of functionalized graphene quantum dots endowed with multicolor emission and size tunability
Source: Royal Society of Chemistry journal article supplement (doi:10.1039/c7tc01342f), 2017-01-01
Supplement: c7tc01342f1.pdf [file c7tc01342f1.pdf]

1

## Supporting Information

2

3

**Controllable ionic liquid-assisted electrochemical exfoliate**

4

**carbon fibers for the green and large-scale preparation of**

5

**functionalized graphene quantum dots endowed with multicolor**

6

**emitting and size tunability**

7

Yuting Yan<sup>a</sup>, Henan Li<sup>b</sup>, Qirui Wang<sup>a</sup>, Hanping Mao<sup>\*a</sup>, Wang Kun<sup>\*a,b</sup>

8

<sup>a</sup>Key Laboratory of Modern Agriculture Equipment and Technology, Institute of

9

Agricultural Engineering, Jiangsu University, Zhenjiang, 212013, P.R. China

10

<sup>b</sup>School of Chemistry and Chemical Engineering, Jiangsu University, Zhenjiang,

11

212013, P. R. China.

12

13

\*Corresponding author. Tel.: +86 511 88791800; fax: +86 511 88791708.

14

E-mail address: wangkun@ujs.edu.cn; maohp@ujs.edu.cn

1

**Fig. S1**

2

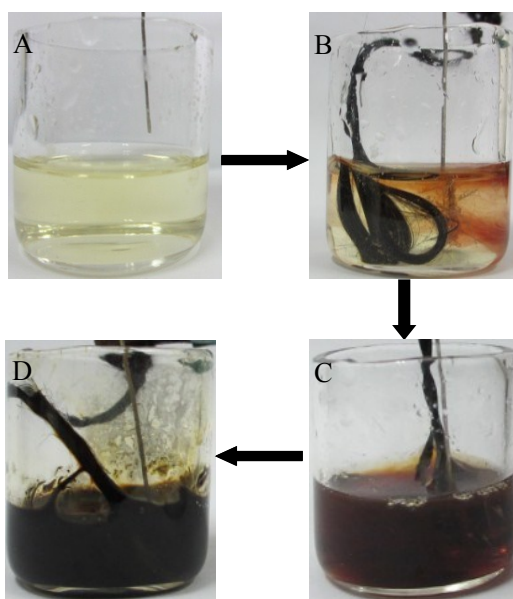

3

4

5 **Fig. S1.** Time evolution of ILs electrolyte and carbon fiber anode during exfoliation in  
6 [Bmim][BF<sub>4</sub>] electrolyte in different stages (A: before exfoliation; B: the beginning of  
7 exfoliation; C: an hour in exfoliation; D: the end of exfoliation).

## 1 Quantum Yields (QYs) Measurements

2 The quantum yields of as-prepared G-GQDs were measured and calculated by  
3 using a comparative method (Table S1). Rhodamine B in water (QYs=0.31) was  
4 chosen as the standard fluorophore with excitation at 340 nm as the reference. And the  
5 quantum yields of the GQDs were calculated according to:

$$6 \quad \Phi = \Phi_R \times \frac{I}{I_R} \times \frac{A_R}{A} \times \frac{n^2}{n_R^2}$$

7 Where  $\Phi$ ,  $I$ ,  $n$  and  $A$  designates the quantum yield, measured integrated emission  
8 intensity, refractive index and the optical absorbance, respectively. The subscript "R"  
9 refers to standard with known quantum yield.

10 **Table S1. QYs of the as-prepared G-GQDs**

| Sample      | Integrated emissions intensity ( $I$ ) | Abs. at 340 nm ( $A$ ) | Refractive index of solvent ( $n$ ) | Quantum yield ( $\Phi$ ) |
|-------------|----------------------------------------|------------------------|-------------------------------------|--------------------------|
| Rhodamine B | 19568                                  | 0.017                  | 1.33                                | 0.31 (known)             |
| G-GQDs      | 13412                                  | 0.042                  | 1.33                                | 0.086                    |

11 In addition, with the assistance of ionic liquid, G-GQDs with a quantum yield up to  
12 8.6% are successfully prepared via electrochemical exfoliate, which is higher than that  
13 of the hydrothermal cleaving routes (< 8%).<sup>1,2</sup>

## 1     **Characterization of the CFs**

2     Raman spectroscopy is considered to be a powerful and efficient technique for  
3     characterizing the carbonization and graphitization on carbon-based materials.<sup>3</sup> The  
4     D- and G-band ( $I_D/I_G$ ) ratio of Raman spectra is a parameter to estimate the disorder  
5     degree and the  $sp^2$  domains. Thus, the Raman spectrum of starting material (CFs) as  
6     showed in Fig. S2A. The characteristic peaks at around  $1359\text{ cm}^{-1}$  (D-band) and  $1589$   
7      $\text{cm}^{-1}$  (G-band), corresponding to the  $sp^3$  hybridized and the  $sp^2$  hybridized,  
8     respectively. From the Raman spectra, it was observed that the small domain structure  
9     of the  $sp^2$  in original CFs (Integrated intensity), which is beneficial to get size  
10    controlled synthesis of GQDs in accordance with Peng's report.<sup>4</sup> Meanwhile, the  
11    higher ratio of  $I_D/I_G$  (Integrated intensity) on original CFs indicated that the existence  
12    of non-graphitized structure in original CFs.<sup>5,6</sup>

13    Further, XRD tool was employed to study the crystalline structure of the original  
14    CFs presented in Fig. S2B. There is an obvious diffraction peak at  $\sim 25.0^\circ$  can be  
15    observed in the spectrum, corresponding to the (002) diffraction of graphitic  
16    structures, the absence of the (110) band at  $\sim 44.0^\circ$  even indicates a non-graphitized  
17    carbonaceous structure in original CFs.<sup>7</sup>

18    Combined with the analysis of Raman and XRD, it is clearly confirmed that CFs  
19    were possessed with carbonized structure. Such a carbonized CFs can be easily  
20    broken down, leading to the creation of GQDs with different size distribution in  
21    scalable amounts.

22

1

Fig. S2

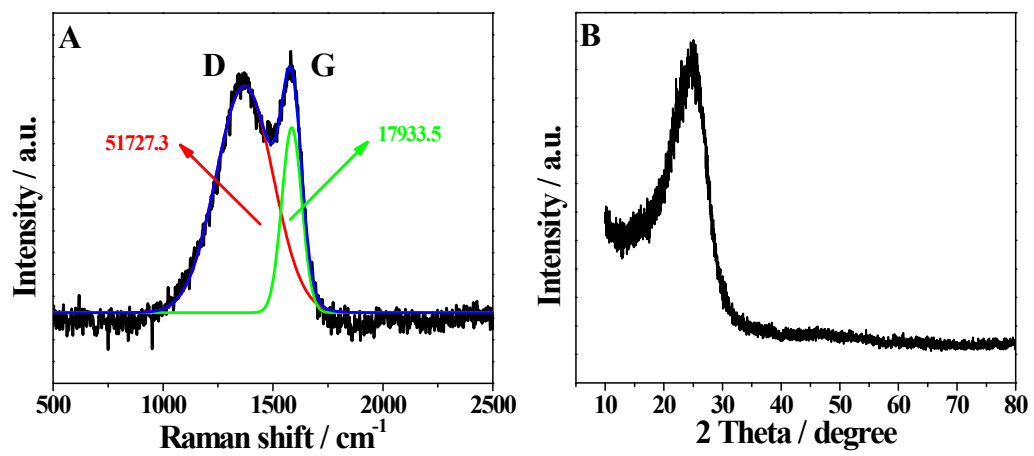

2

3

Fig. S2. Raman spectra (A) and XRD pattern (B) of original CFs.

1

Fig. S3

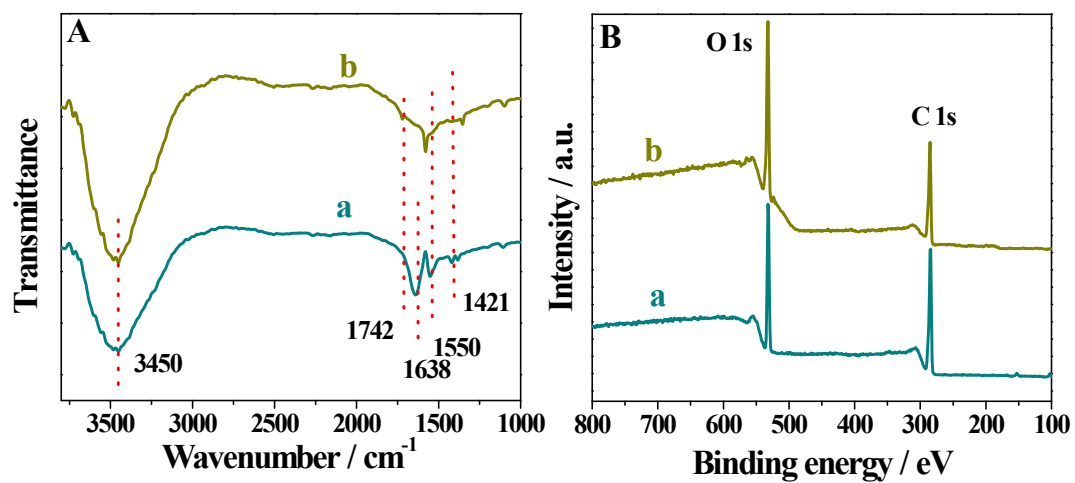

2

3 **Fig. S3.** (A) FTIR and (B) XPS spectra of G-GQDs (a) and Y-GQDs (b) were  
4 synthesized with ratios of H<sub>2</sub>O/ILs at 15% and 30% as electrolyte, respectively.

1

Fig. S4

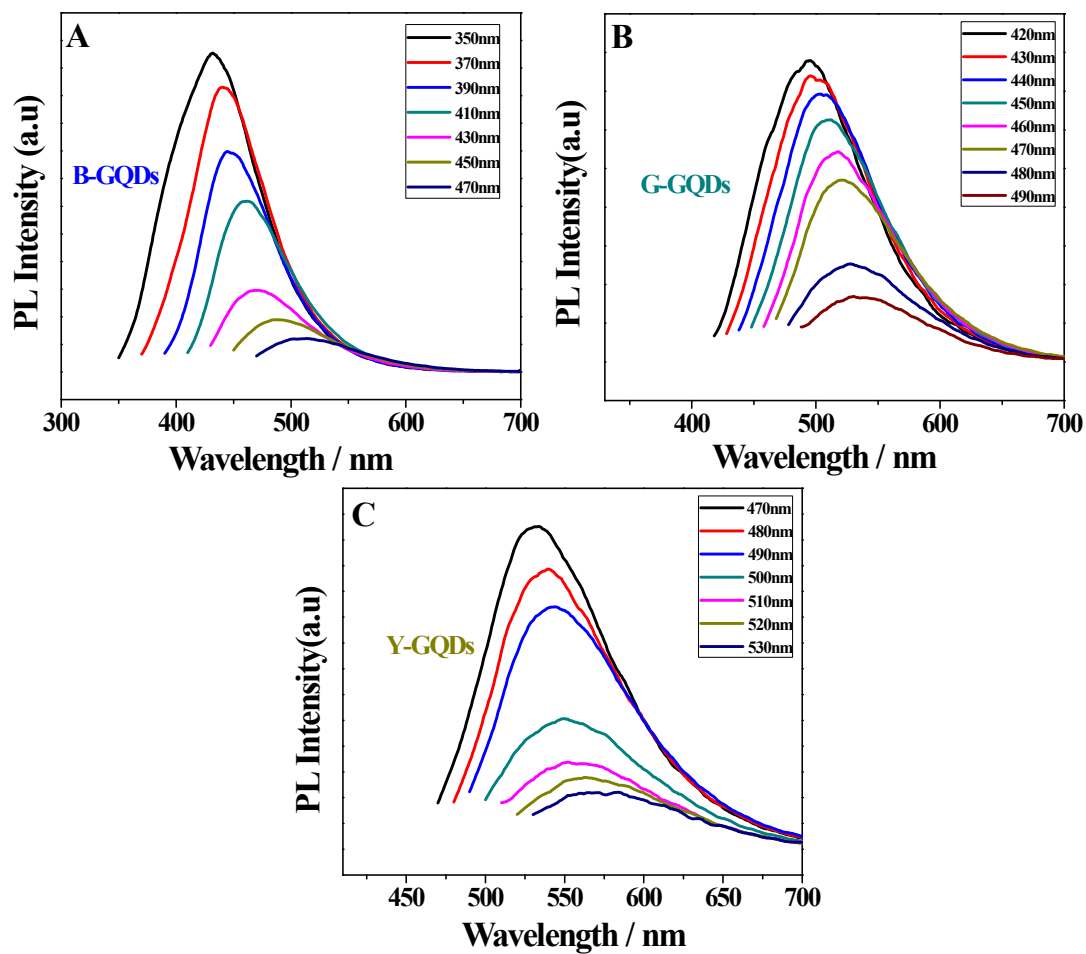

2

3 **Fig. S4.** The PL spectra of the (A) B-GQDs, (B) G-GQDs and (C) Y-GQDs aqueous

4 solution excited by various wavelengths, respectively.

## 1 **The effect of the water on the electrochemical properties of ILs**

2 In order to investigate the influence of the water on the electrochemical properties  
3 of ILs, the cyclic voltammeters (CVs) recorded in ILs contain different content of  
4 H<sub>2</sub>O, as shown in Fig. S5. It is seen that the electrochemical potential window of the  
5 IL/water was decreased with the content of water from 0 wt % H<sub>2</sub>O to 30 wt % H<sub>2</sub>O  
6 (Fig. S5A). Thus, we can infer that the trend of decreasing activation voltages with  
7 increasing water content is correlated to the smaller over potential required for the  
8 electrochemical oxidation of water. As such, hydroxyl radicals released from the  
9 oxidation of water may play an important role. Meanwhile, the viscosity of ILs may  
10 be changed by other means such as stirring, so we also investigate the effect of  
11 stirring on viscosity of ILs by CV test. However, there is no any change on  
12 electrochemical potential window of pure ILs before and after stirring from CV  
13 curves (Fig. S5B).



1

Fig. S5

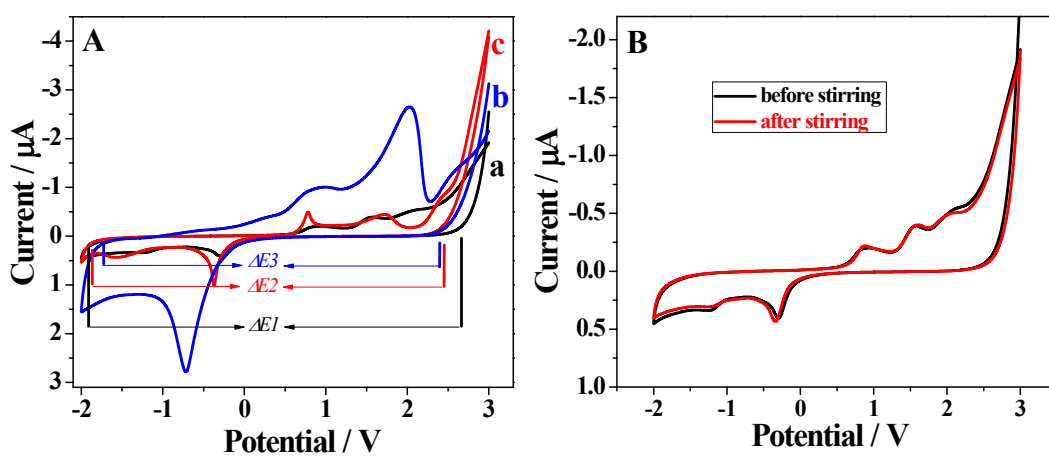

2

3 **Fig. S5.** (A) CVs curve recorded in different electrolyte with volume ratio of H<sub>2</sub>O/ILs

4 at (a) 0%, (b) 15% and (c) 30%, respectively; (B) CVs curve recorded in pure ILs

5 before and after stirring.

1

Fig. S6

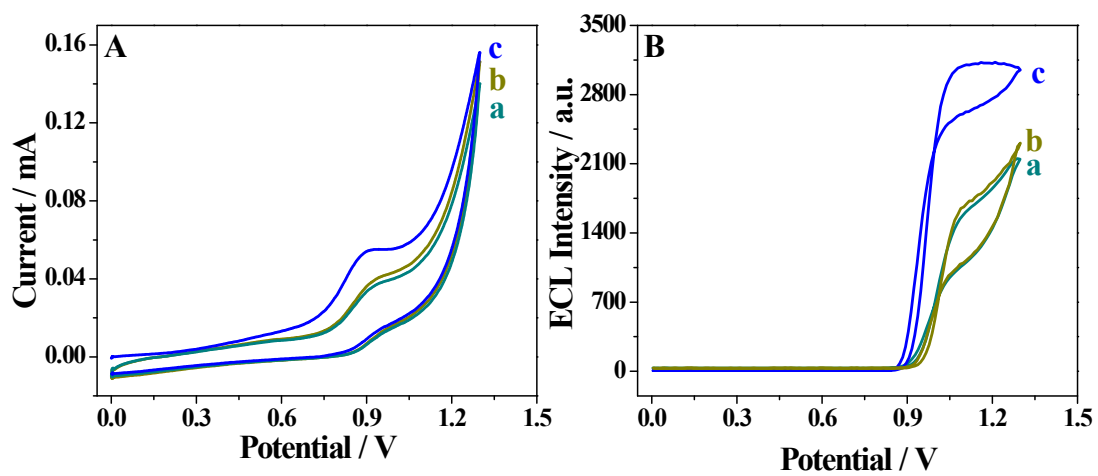

2

3 **Fig. S6.** (A) CV and (B) ECL-potential curves of (a) G-GQDs/Ru(bpy)<sub>3</sub><sup>2+</sup>, (b) G-  
4 GQDs/Ru(bpy)<sub>3</sub><sup>2+</sup> and (c) B-GQDs/ Ru(bpy)<sub>3</sub><sup>2+</sup> in 0.1 M pH 9.0 PBS.

1

Fig. S7

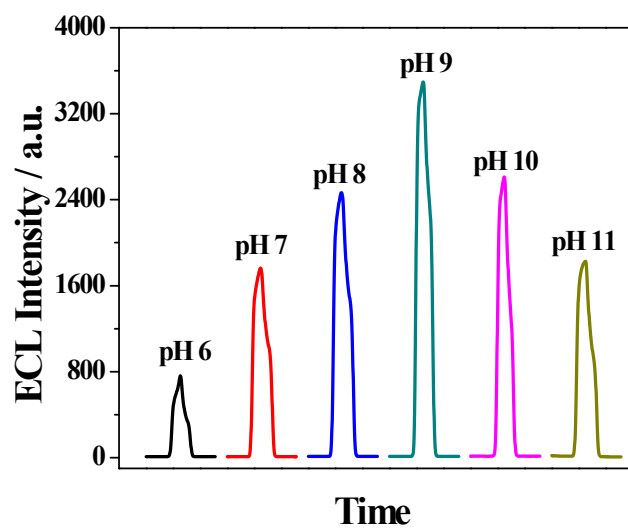

2

3 **Fig. S7.** ECL-potential curves of the B-GQDs/Ru(bpy)<sub>3</sub><sup>2+</sup> in PBS with different pH

4 values.

1

Fig. S8

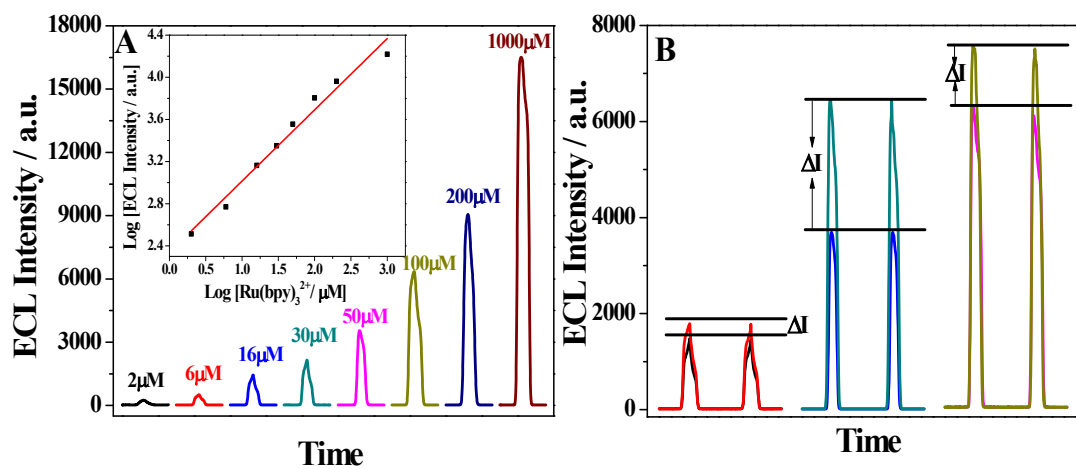

2

3 **Fig. S8.** (A) ECL-potential curves of the B-GQDs/Ru(bpy)<sub>3</sub><sup>2+</sup> in PBS (pH 9.0) with  
 4 different Ru(bpy)<sub>3</sub><sup>2+</sup> concentration, inset: Calibration curve for Ru(bpy)<sub>3</sub><sup>2+</sup>; (B) Effect  
 5 of Ru(bpy)<sub>3</sub><sup>2+</sup> concentration on the change of ECL intensity with PCP.

## 1 **Selectivity, reproducibility and stability of the ECL sensing**

2 Further, the long-term stability of the as-constructed ECL sensor was investigated  
3 during 25 days by measuring the ECL response upon of B-GQDs/Ru(bpy)<sub>3</sub><sup>2+</sup> system  
4 in 0.1 M PBS (pH 9.0) with adding 50 pg mL<sup>-1</sup> PCP (Fig.S9A). In a series of five  
5 electrodes prepared in the same way, a relative standard deviation (RSD) of 4.5% was  
6 obtained, indicating the reliability of the 25 days.

7 In addition, the specificity of this ECL sensor was studied using 3-chlorophenol (3-  
8 CP), 2,4,6-trichlorophenol (1,3,5-TCP), and 2,4-dichlorophenol (2,4-DCP) as  
9 interferents. As shown in Fig. S9B, only PCP enhanced the ECL emission of B-  
10 GQDs/Ru(bpy)<sub>3</sub><sup>2+</sup> system dramatically, whereas the analogs of PCP changed the ECL  
11 emission slightly (e.g., 3-CP, 1,3,5-TCP, 2,4-DCP). The reason might be attributed to  
12 that the above interferents possess more stable chemical properties, which did not  
13 make a better facilitate effect to electrochemical reaction of Ru(bpy)<sub>3</sub><sup>2+</sup>.

1

Fig. S9

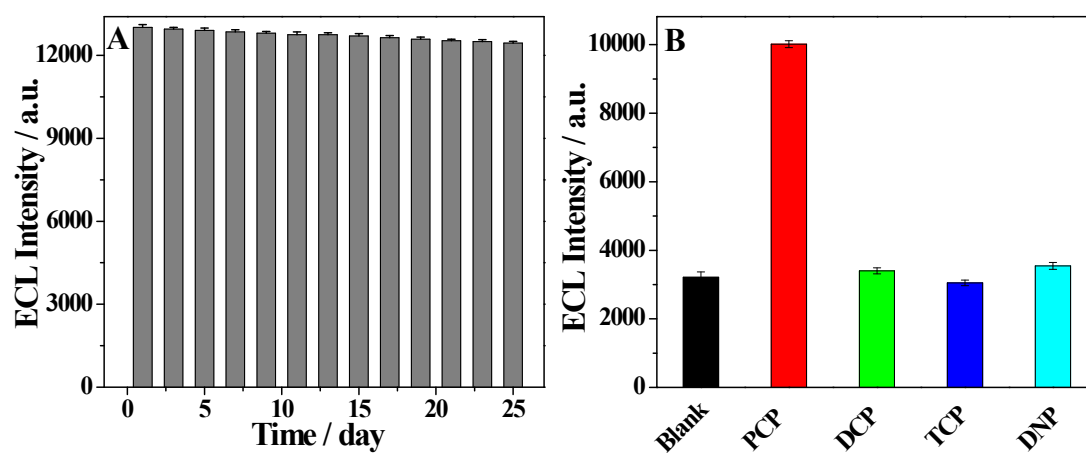

2

3 **Fig. S9.** (A) Stability of the ECL sensor over 25 days in 0.1 mol L<sup>-1</sup> PBS (pH 9.0)

4 with 50 pg mL<sup>-1</sup> PCP; (B) ECL of 10 pg mL<sup>-1</sup> DCP, TCP, DNP and PCP on the

5 responses of the sensor in 0.1 mol L<sup>-1</sup> PBS (pH 9.0).

1 **Table S2** Comparison of other ECL systems for determination of PCP

| Materials    | Linear range                      | Detection limit         | Ref.      |
|--------------|-----------------------------------|-------------------------|-----------|
| GQDs-CdS NCs | 0.01 ~ 500 ng mL <sup>-1</sup>    | 3 pg mL <sup>-1</sup>   | [8]       |
| CuO NWs/rGO  | 0.027 ~ 266.3 ng mL <sup>-1</sup> | 9 pg mL <sup>-1</sup>   | [9]       |
| MWCNTs@GONRs | 0.002 ~ 10 ng mL <sup>-1</sup>    | 0.7 pg mL <sup>-1</sup> | [10]      |
| B-GQDs       | 0.02 ~ 150 pg mL <sup>-1</sup>    | 6.7 fg mL <sup>-1</sup> | this work |

1     **Notes and references**

- 2     1 D. Y. Pan, J. C. Zhang, Z. Li and M. H. Wu, *Adv. Mater.*, 2010, **22**, 734–738.
- 3     2 J. H. Shen, Y. H. Zhu, C. Chen, X. L. Yang and C. Z. Li, *Chem. Commun.*, 2011, **47**,
- 4     2580–2582.
- 5     3 C. Gomez-Navarro, R. T. Weitz, A. M. Bittner, M. Scolari, A. Mews, M. Burghard
- 6     and K. Kern, *Nano Lett.*, 2007, **7**, 3499–3503.
- 7     4 J. Peng, W. Gao, B. K. Gupta, Z. Liu, R. Romero-Aburto, L. H. Ge, L. Song, L. B.
- 8     Alemany, X. B. Zhan, G. H. Gao, S. A. Vithayathil, B. A. Kaiparettu, A. A. Marti,
- 9     T. Hayashi, J. J. Zhu, P. M. Ajayan, S. A. Vithayathil, B. A. Kaiparettu, A. A.
- 10    Marti, T. Hayashi, J. J. Zhu and P. M. Ajayan, *Nano Lett.*, 2012, **12**, 844–849.
- 11   5 K. J. Wei Y., Wang, W. Q. Han, J. S. Li, X. Y. Sun, J. Y. Shen and L. J. Wang, *J.*
- 12   *Power Sources*, 2016, **318**, 57–65.
- 13   6 P. Han, T. Yuan, L. Yao, Z. Han, J. H. Yang and S. Y. Zheng, *Nanoscale Res. Lett.*,
- 14   2016, **11**, 1–8.
- 15   7 W. Xie, H. F. Cheng, Z. Y. Chu, Z. H. Chen and C. G. Long, *Ceram. Int.*, 2011, **37**,
- 16   1947–1951.
- 17   8 Q. Liu, K. Wang, J. Huan, G. B. Zhu, J. Qian, H. P. Mao and J. R. Cai, *Analyst*,
- 18   2014, **139**, 2912–2918.
- 19   9 W. Q. Wu, X. Hua, S. L. Luo, C. B. Liu, Y. H. Tang and L. M. Yang, *Sens.*
- 20   *Actuators B*, 2016, **222**, 747–754.
- 21   10 Q. Liu, J. Huan, A. R. Fei, H. P. Mao and K. Wang, *Talanta*, 2015, **134**, 448–452.

22
